# Supplementary material for: Enhanced carrier mobility and tunable electronic properties in α-tellurene monolayer via an α-tellurene and h-BN heterostructure
Source: Royal Society of Chemistry journal article supplement (doi:10.1039/d0cp00269k), 2020-01-01
Supplement: d0cp00269k1.pdf [file d0cp00269k1.pdf]

## 1. Optimization results of the different vdW corrections

**Table SI.** Lattice constants, binding energies and interlayer distances of the Te/BN bilayer with the different configurations as well as the *h*-BN and  $\alpha$ -tellurene monolayers

|              |             | <i>h</i> -BN | $\alpha$ -<br>tellurene | T <sub>1</sub> -<br>stacking | T <sub>2</sub> -<br>stacking | B-<br>stacking | H-<br>stacking |
|--------------|-------------|--------------|-------------------------|------------------------------|------------------------------|----------------|----------------|
| DFT-D2       | Latt. (Å)   | 2.51         | 4.23                    | 4.33                         | 4.34                         | 4.34           | 4.34           |
|              | $E_b$ (meV) |              |                         | 19                           | 19                           | 19             | 18             |
|              | $d_z$ (Å)   |              |                         | 4.03                         | 4.12                         | 4.10           | 4.01           |
| DFT-D3       | Latt. (Å)   | 2.51         | 4.22                    | 4.33                         | 4.33                         | 4.33           | 4.33           |
|              | $E_b$ (meV) |              |                         | -177                         | -173                         | -176           | -182           |
|              | $d_z$ (Å)   |              |                         | 3.56                         | 3.61                         | 3.60           | 3.57           |
| DFT-TS       | Latt. (Å)   | 2.51         | 4.23                    | 4.34                         | 4.34                         | 4.34           | 4.34           |
|              | $E_b$ (meV) |              |                         | 21                           | 19                           | 18             | 16             |
|              | $d_z$ (Å)   |              |                         | 3.98                         | 4.10                         | 4.21           | 4.06           |
| DFT-dD<br>sC | Latt. (Å)   | 2.50         | 4.18                    | 4.33                         | 4.32                         | 4.33           | 4.33           |
|              | $E_b$ (meV) |              |                         | 329                          | 333                          | 330            | 327            |
|              | $d_z$ (Å)   |              |                         | 3.61                         | 3.63                         | 3.61           | 3.60           |

## 2. Computational details of the carrier mobilities of $\alpha$ -tellurene and Te/BN bilayer

Using the acoustic phonon limited method, we quantitatively estimate the room-temperature carrier mobility for tellurene and Te/BN bilayer. The carrier

mobility of 2D material is given by  $\mu_{2D} = \frac{eh^3 C_{2D}}{k_B T m^* m_d (E_1^i)^2}$ , where  $m^*$  is the effective

mass in the transport direction and  $m_d$  is the average effective mass determined by

$m_d = \sqrt{m_x^* m_y^*}$ . The term  $E_1$  represents the deformation potential constant of the

valence-band minimum (VBM) for hole or the conduction-band maximum (CBM) for

electron along the transport direction, defined by  $E_1^i = \Delta V_i / (\Delta l / l_0)$ . Here,  $\Delta V_i$

denotes the energy change of VBM or CBM when tellurene is compressed or dilated

from the equilibrium  $l_0$  by a distance of  $\Delta l$ . The term  $C_{2D}$  is the elastic modulus of

the longitudinal strain in the propagation directions (*armchair* or *zigzag*) of the

longitudinal acoustic wave, which can be derived from  $(E - E_0) / S_0 = C(\Delta l / l_0)^2 / 2$ :  $E$  and  $S_0$  denote the total energy and lattice area of tellurene, respectively. We used  $\Delta l / l_0$  ranging from -1.0% to 1.0% to fit the values of  $C_{2D}$  and  $E_1^i$  for  $\alpha$ -tellurene and the Te/BN bilayer (Figure S1 and Figure S2), respectively.

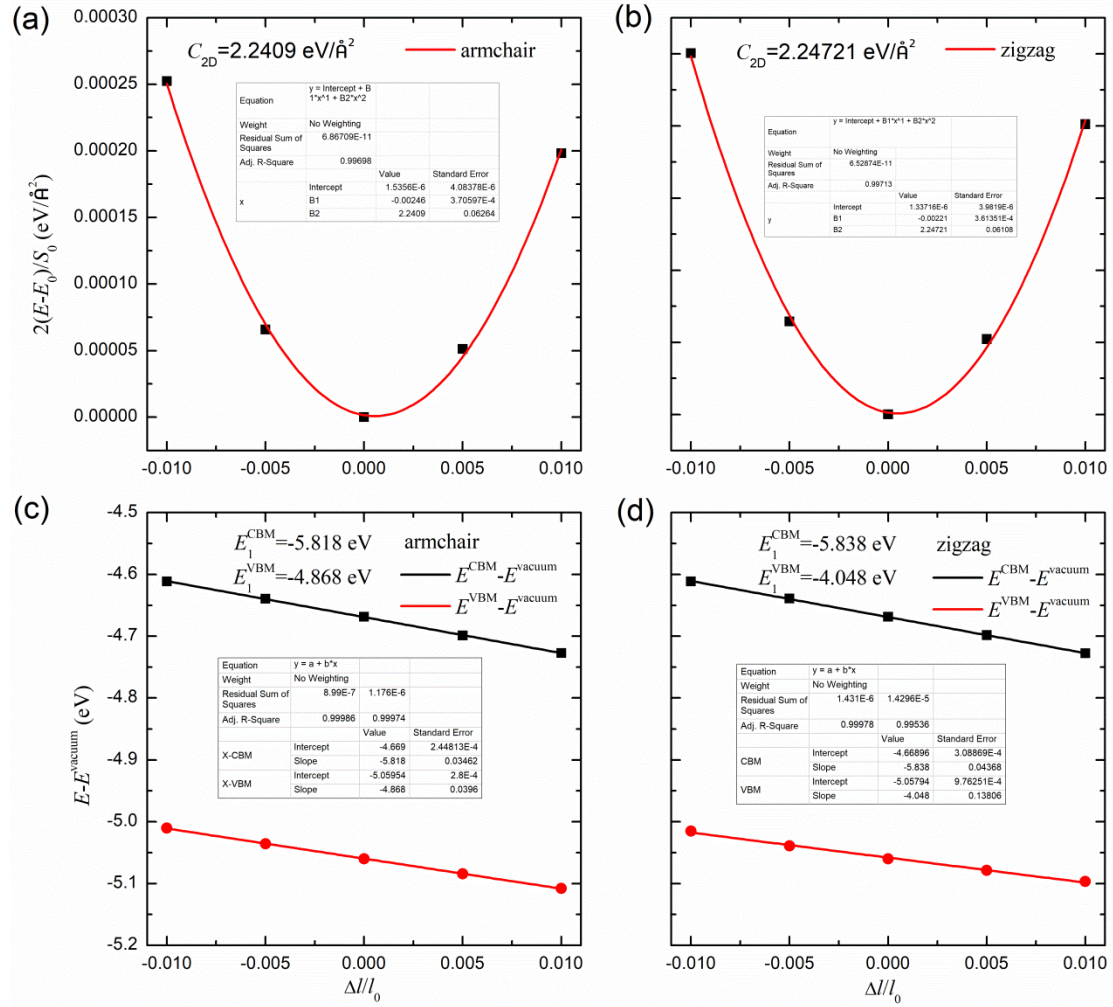

Figure S1. In-plane stiffnesses of deformation potentials of  $\alpha$ -tellurene based on PBE+SOC band structures. (a) and (b) are the in-plane stiffnesses in the armchair and zigzag directions, respectively. (c) and (d) are the deformation potentials of the VBM and CBM in the armchair and zigzag directions, respectively.

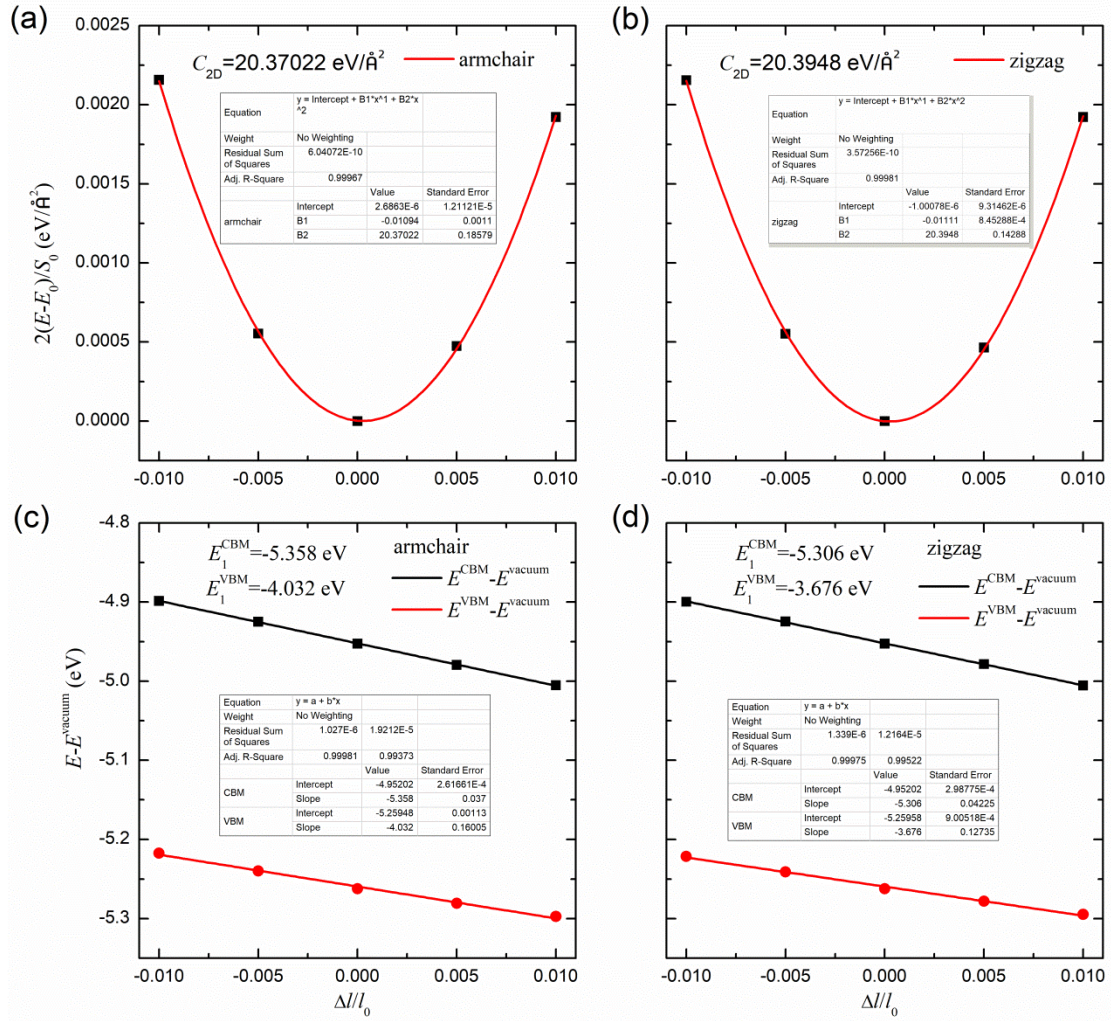

Figure S1. In-plane stiffnesses of deformation potentials of the Te/BN bilayer based on PBE+SOC band structures. (a) and (b) are the in-plane stiffnesses in the armchair and zigzag directions, respectively. (c) and (d) are the deformation potentials of the VBM and CBM in the armchair and zigzag directions, respectively.
